# Supplementary material for: Identifying alpine treeline species using high-resolution WorldView-3 multispectral imagery and convolutional neural networks
Source: Copernicus journal article supplement (doi:10.5194/egusphere-2025-970), 2025-05-28
Supplement: Supplementary file [file egusphere-2025-970-AC1-supplement.pdf]

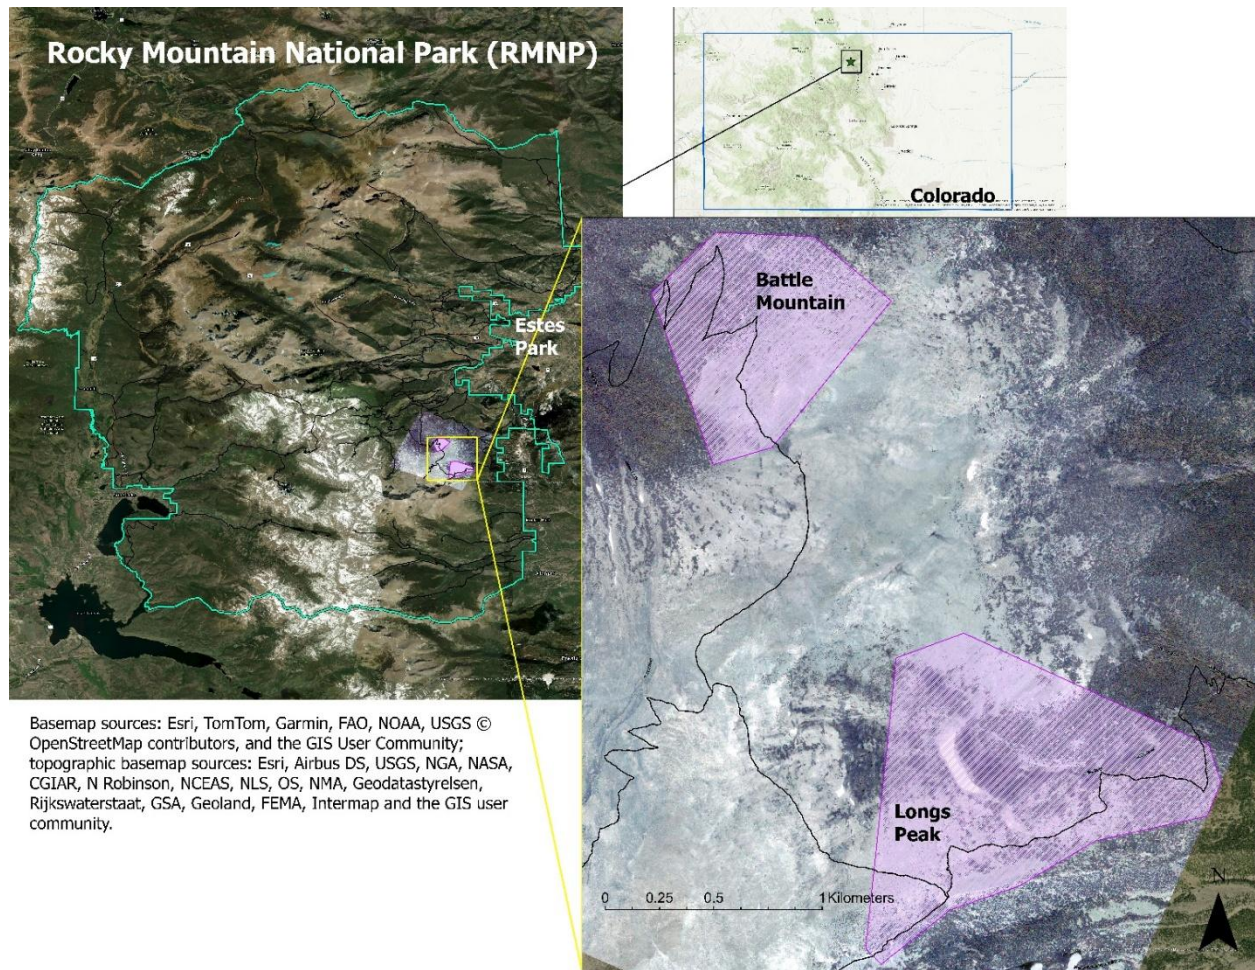

Figure 1. Locations of study areas and WV-3 imagery within RMNP and Colorado. The boundary of Colorado can be seen in blue in the top right inset map. The RMNP boundary is in pale green in the left map; the town of Estes Park is marked for reference. The study areas (Battle Mountain and Longs Peak) are purple polygons visible over the WV-3 imagery extent, displayed in RGB (Red = red band, Green = green band, Blue = blue band) in both the map on the left and the enlarged inset map on the right.



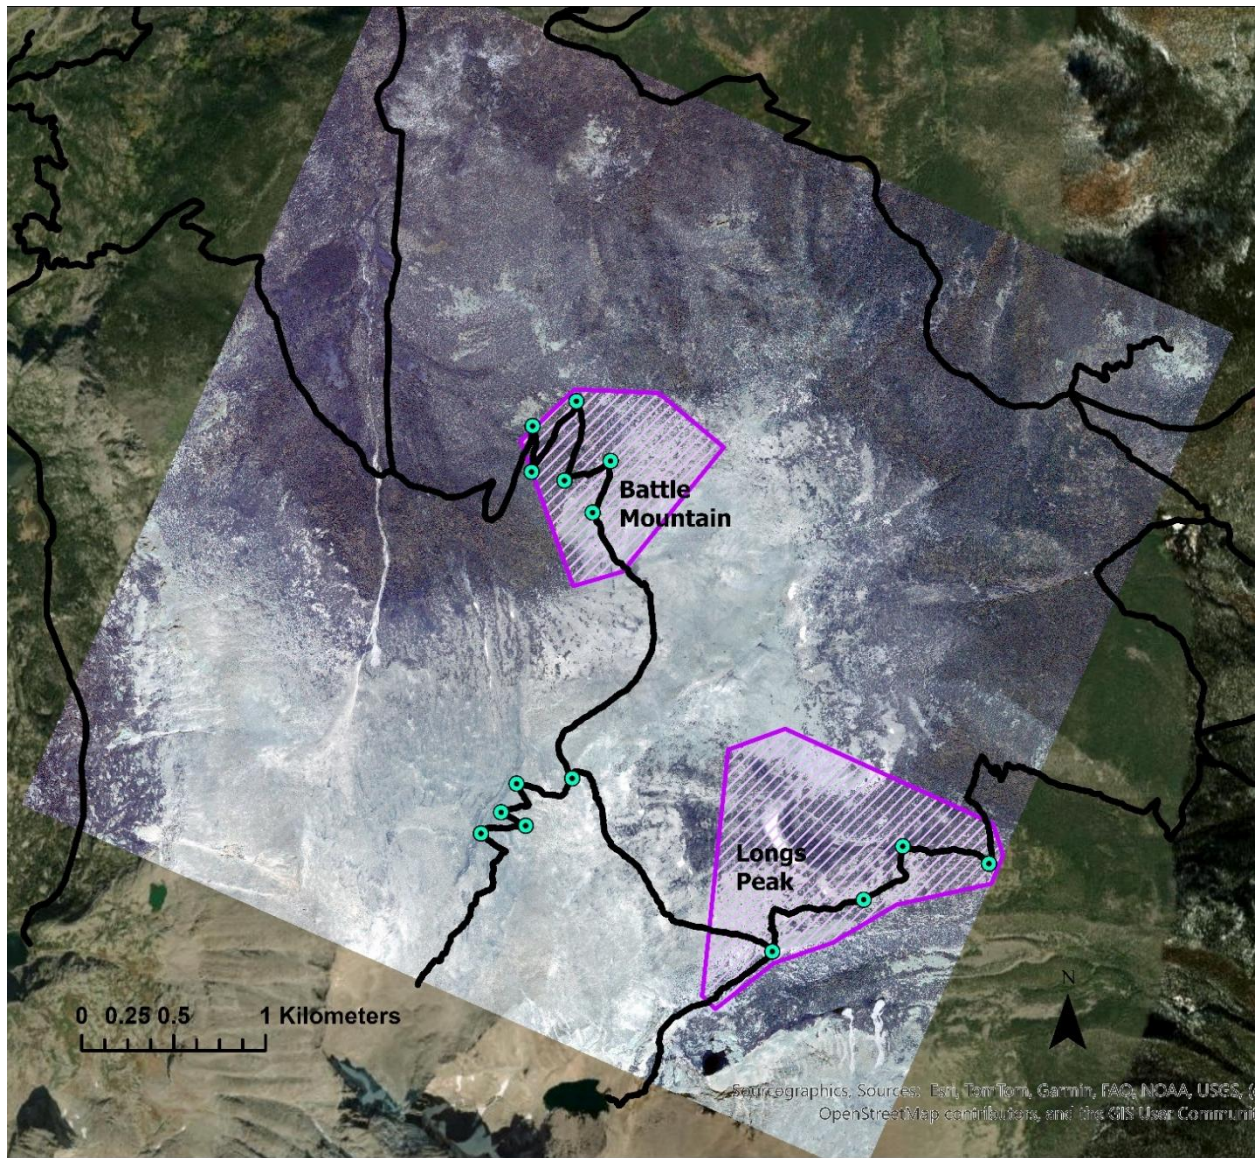

Figure A1. Teal points mark the locations of ground control points collected in Rocky Mountain National Park over the WV-3 satellite image, displayed in RGB. The Battle Mountain and Longs Peak study areas are delineated in purple. Trails are marked with black lines. Please see Figure 1 for copyright details.
